# Supplementary material for: Multilocus genetics to reconstruct aeromonad evolution
Source: PubMed Central journal article supplement (PMC3487998; doi:10.1186/1471-2180-12-62), 2012-04-30
Supplement: 1471-2180-12-62-S3.pdf [file 1471-2180-12-62-S3.pdf]

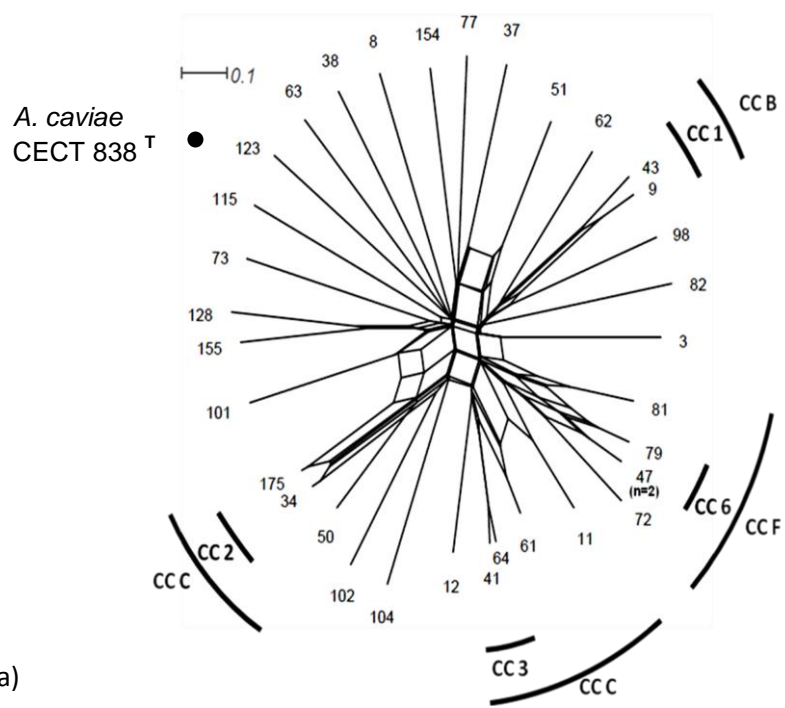

(a)

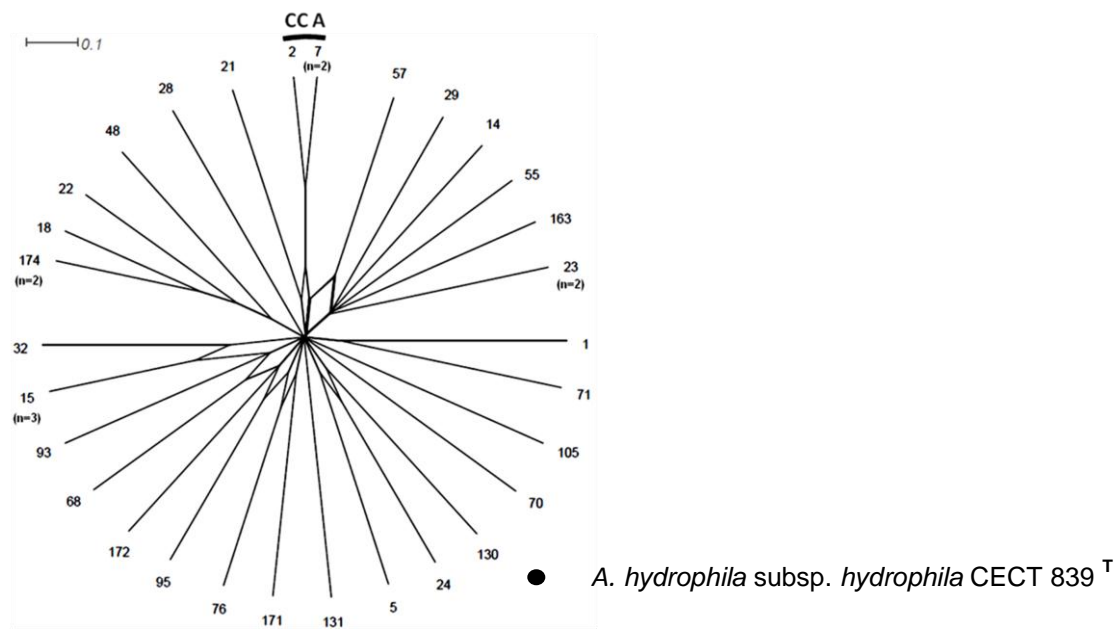

(b)

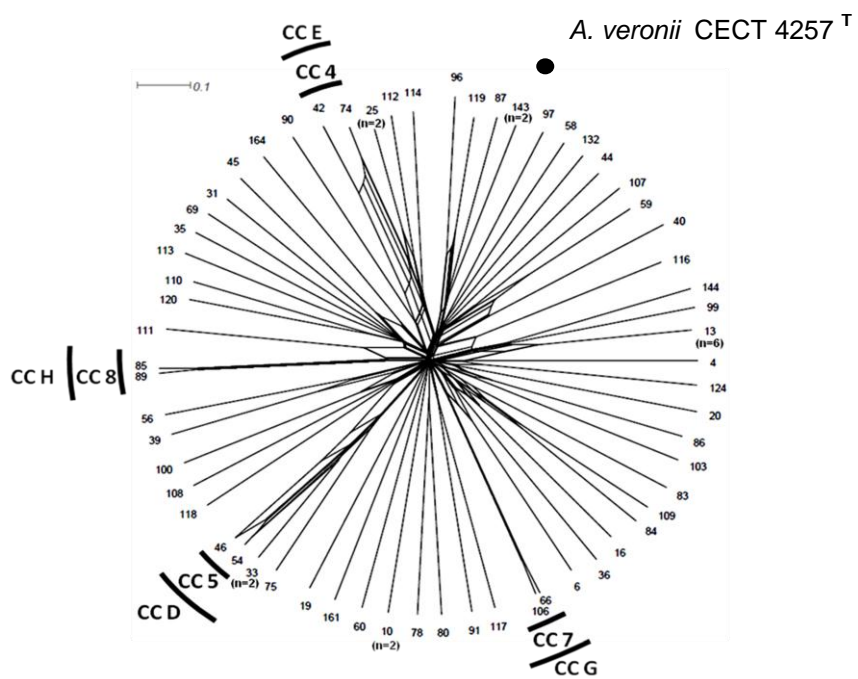

(c)
